# Supplementary material for: CoaSim: A flexible environment for simulating genetic data under coalescent models
Source: Springer Nature journal article supplement (doi:10.1186/1471-2105-6-252), 2005-10-14

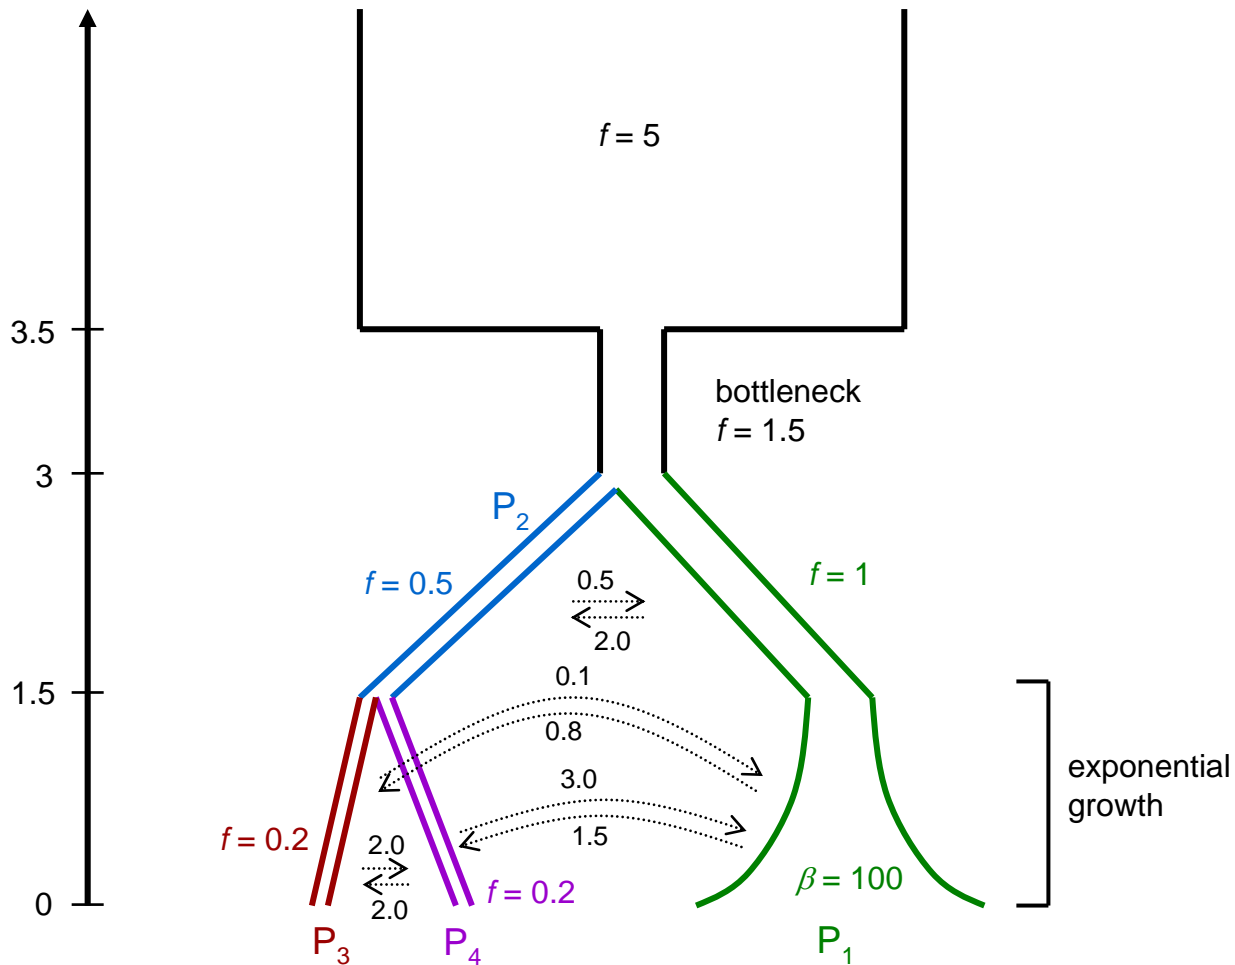

Supplement: 12859_2005_577_MOESM8_ESM.pdf [file 12859_2005_577_MOESM8_ESM.pdf]
