# Supplementary material for: CoaSim: A flexible environment for simulating genetic data under coalescent models
Source: Springer Nature journal article supplement (doi:10.1186/1471-2105-6-252), 2005-10-14
Supplement: 12859_2005_577_MOESM9_ESM.pdf [file 12859_2005_577_MOESM9_ESM.pdf]

```

(simulate markers
  ;; population structure setup
  '(population 5 :epochs (bottleneck 1.5 3 3.5)
    (merge 3
      (population p1 1 :epochs (growth 100 0 1.5) (sample 100))
      (population p2 0.5
        (merge 1.5
          (population p3 0.2 (sample 50))
          (population p4 0.2 (sample 50))))))
  ;; migration rates between populations
  :migration '(;; population p1 and p2
    (migration p1 p2 0.5 1.5 3)
    (migration p2 p1 2.0 1.5 3)
    ;; populations p1, p3 and p4
    (migration p1 p3 0.1 0 1.5)
    (migration p3 p1 0.8 0 1.5)
    (migration p1 p4 3.0 0 1.5)
    (migration p4 p1 1.5 0 1.5)
    ;; population p3 and p4
    (migration p3 p4 2.0 0 1.5)
    (migration p4 p3 2.0 0 1.5)))

```
